# Supplementary material
Source: PubMed Central journal article supplement (PMC4676538)
Supplement: supp_115.182808_FigureS2.pdf [file supp_115.182808_FigureS2.pdf]

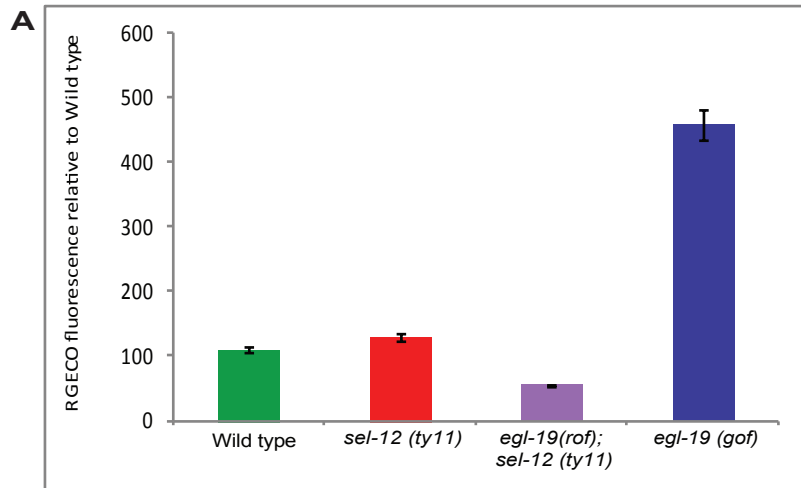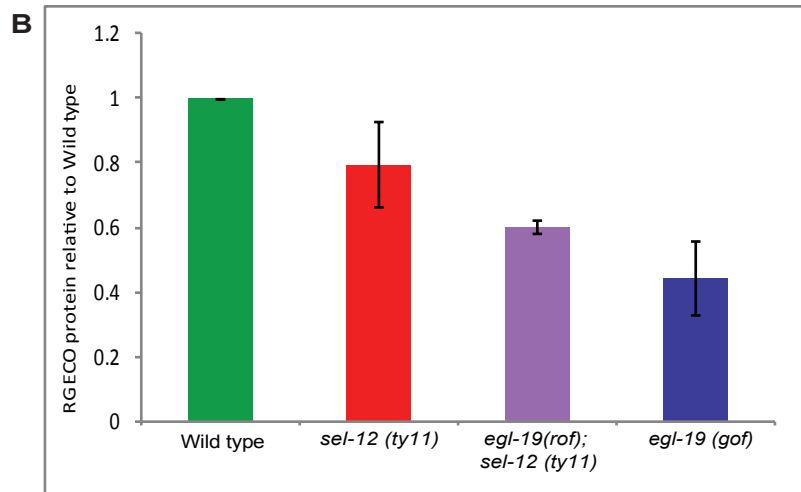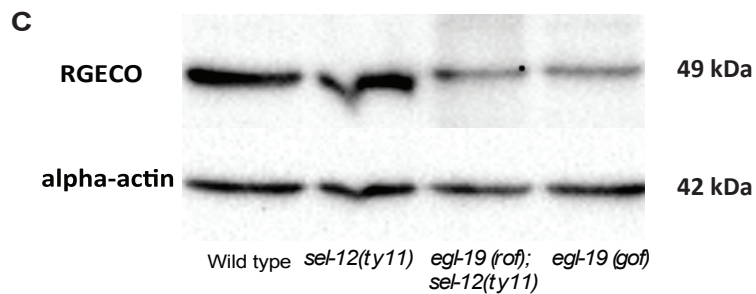

**Figure S2.** Basal cytoplasmic calcium measurement. (A) Quantification of the relative R-GECO1 fluorescence in each strain with respect to wild type animals (n=50 per strain). (B) Quantification of the relative R-GECO1 protein expression in each strain with respect to wild type animals (average of intensities from 3 western blots). (C) Representative western blot performed for R-GECO1 quantification (alpha-actin used as loading control). Data are displayed as mean  $\pm$  SEM and all comparisons have been made to WT unless otherwise indicated.
