# Supplementary material
Source: PubMed Central journal article supplement (PMC4676538)
Supplement: supp_115.182808_FigureS3.pdf [file supp_115.182808_FigureS3.pdf]

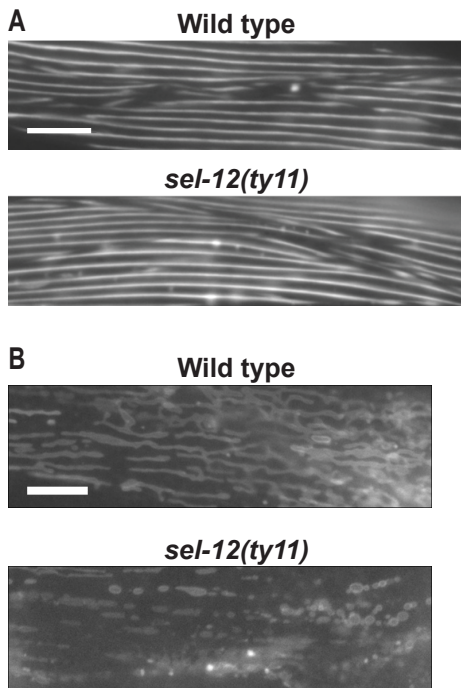

**Figure S3.** Mitochondrial structural defects in *sel-12* mutants are not caused by muscle structure abnormalities. (A) Representative images of body wall muscle myofilament organization (*stEx30*) in wild type and *sel-12(ty11)* animals. (B) Representative images of body wall muscle mitochondria in wild type and *sel-12(ty11)* animals visualized using a reporter strain that targets mCherry to the outer mitochondrial membrane (*sysIs243*). Scale bar represents 10 μm.
