# Supplementary material
Source: PubMed Central journal article supplement (PMC4676538)
Supplement: supp_115.182808_FigureS4.pdf [file supp_115.182808_FigureS4.pdf]

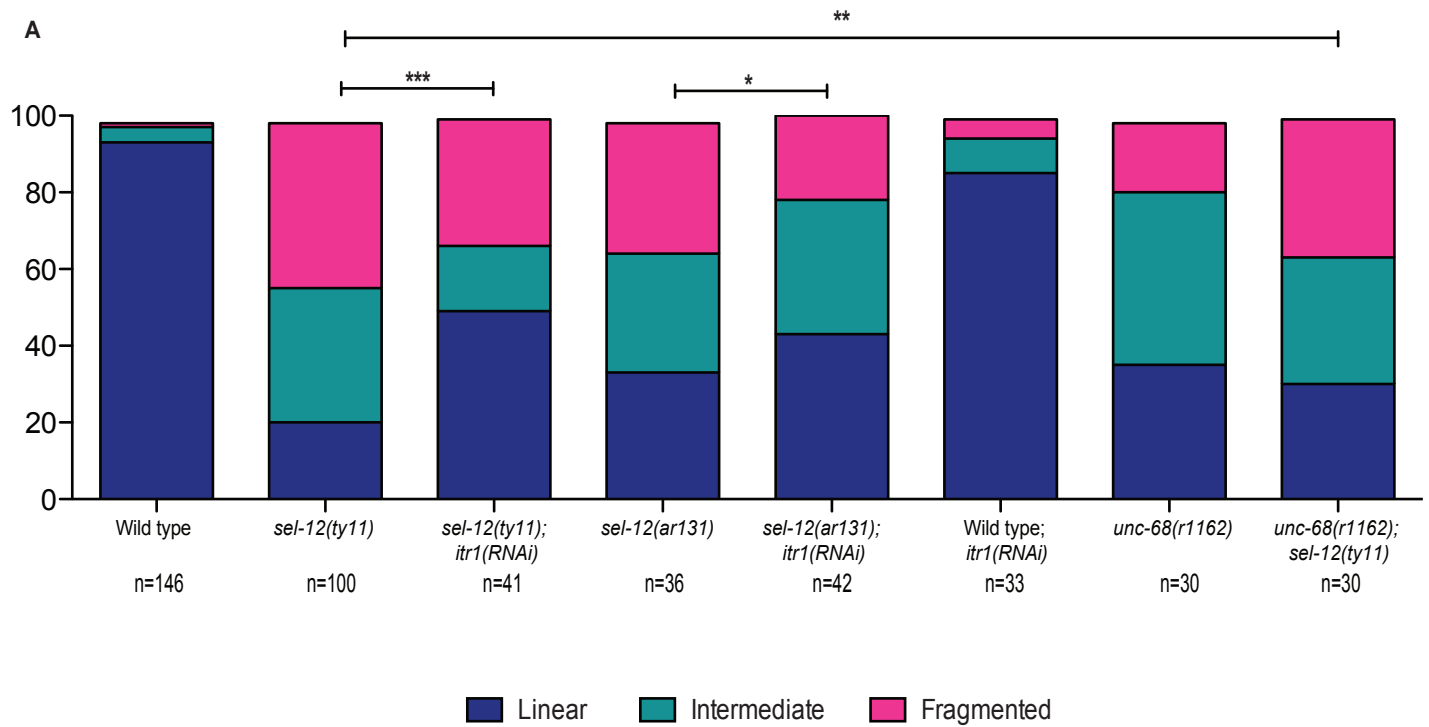

**Figure S4.** Decreasing ER-mediated calcium release improves mitochondrial structure in *sel-12* mutant. (A) Quantification of body wall muscle mitochondrial morphology in wild type and *sel-12(ty11)* grown on control or *itr-1* RNAi, *unc-68(r1162)*, and *unc-68(r1162); sel-12(ty11)* animals. n = number of animals imaged per genotype, all comparisons have been made to WT unless otherwise indicated and statistical significance was tested using the Chi-square test (\*\*\*)  $p < 0.001$ , ns not significant).
